# Supplementary material for: PEDOT:PSS versus Polyaniline: A Comparative Study of Conducting Polymers for Organic Electrochemical Transistors
Source: MDPI journal article supplement (doi:10.3390/polym15244657), 2023-12-10
Supplement: s1 [file s1]

Supporting Information

for

**PEDOT:PSS versus Polyaniline: A Comparative Study of Conducting  
Polymers for Organic Electrochemical Transistors**

*Ryotaro Kawamura and Tsuyoshi Michinobu\**

Department of Materials Science and Engineering, Tokyo Institute of Technology, 2-12-

1 Ookayama, Meguro-ku, Tokyo 152-8552, Japan.

\*E-mail: michinobu.t.aa@m.titech.ac.jp

## **General Measurements**

A patterned electrode (BAS 0011598) was used as the substrate electrode of OECTs. A ultraviolet ozone cleaner (TECHNOVISION, INC. UV-208) was used to clean the substrate of OECTs. A spin coater used was MIKASA MS-B100. For thermal annealing, a digital hotplate of CORNING PC-400D was used. Output and transfer characteristics were measured using a parameter analyzer, KEITHLEY 4200A-SCS. Film thickness measurements were done with a surface profilometer, KLA-Tencor D-100. Atomic force microscopy (AFM) was measured by using an SPI3800N and SPA300 with a stiff cantilever DF-20.

## Supporting Tables

**Table S1** Characteristics of OECTs based on PEDOT:PSS

| Sample                                            | P1000-<br>5s | P1500-<br>5s | P2000-<br>5s | P2500-<br>5s | P3000-<br>5s | P2000-<br>0s | P2000-<br>5min | P2000-<br>15min | P2000-<br>1h | P2000-<br>18h |
|---------------------------------------------------|--------------|--------------|--------------|--------------|--------------|--------------|----------------|-----------------|--------------|---------------|
| <b>ON Resistance</b><br>[ $\Omega$ ]              | 1400         | 1200         | 1160         | 1300         | 1470         | 940          | 1310           | 1350            | 1310         | 1080          |
| <b>Resistivity</b><br>[ $\Omega \cdot \text{m}$ ] | 0.12         | 0.090        | 0.067        | 0.065        | 0.055        | 0.052        | 0.075          | 0.078           | 0.075        | 0.062         |
| <b>Conductivity</b><br>[S/m]                      | 8.16         | 11.1         | 15.0         | 15.4         | 18.1         | 19.3         | 13.3           | 12.9            | 13.3         | 16.1          |
| <b>Thickness</b><br>[nm]                          | $\pm 0.23$   | $\pm 0.4$    | $\pm 1.6$    | $\pm 1.4$    | $\pm 1.7$    | $\pm 1.7$    | $\pm 1.4$      | $\pm 1.4$       | $\pm 1.4$    | $\pm 1.8$     |
|                                                   | 350          | 300          | 230          | 200          | 150          | 220          | 230            | 230             | 230          | 230           |
|                                                   | $\pm 10$     | $\pm 11$     | $\pm 25$     | $\pm 18$     | $\pm 14$     | $\pm 19$     | $\pm 25$       | $\pm 25$        | $\pm 25$     | $\pm 25$      |

**Table S2** Characteristics of OECTs based on PANI

| Sample                                            | PA1000-<br>5s | PA1500-<br>5s | PA2000-<br>5s | PA2500-<br>5s | PA3000-<br>5s | PA1500-<br>0s | PAD1500-<br>5s | PAD3000-<br>5s | PAD1500-<br>0s |
|---------------------------------------------------|---------------|---------------|---------------|---------------|---------------|---------------|----------------|----------------|----------------|
| <b>ON Resistance</b><br>[ $\Omega$ ]              | 2790          | 3380          | 3410          | 3750          | 3990          | 2920          | 3770           | 4710           | 4240           |
| <b>Resistivity</b><br>[ $\Omega \cdot \text{m}$ ] | 1.10          | 1.13          | 0.96          | 0.98          | 0.98          | 0.83          | 0.91           | 0.99           | 1.29           |
| <b>Conductivity</b><br>[S/m]                      | $\pm 0.04$    | $\pm 0.03$    | $\pm 0.03$    | $\pm 0.03$    | $\pm 0.03$    | $\pm 0.01$    | $\pm 0.06$     | $\pm 0.02$     | $\pm 0.02$     |
|                                                   | 0.91          | 0.88          | 1.05          | 1.03          | 1.02          | 1.20          | 1.09           | 1.01           | 0.77           |
| <b>Thickness</b><br>[ $\mu\text{m}$ ]             | $\pm 0.04$    | $\pm 0.03$    | $\pm 0.04$    | $\pm 0.03$    | $\pm 0.03$    | $\pm 0.01$    | $\pm 0.07$     | $\pm 0.02$     | $\pm 0.01$     |
|                                                   | 1.57          | 1.34          | 1.12          | 1.04          | 0.98          | 1.14          | 0.97           | 0.84           | 1.22           |
|                                                   | $\pm 0.06$    | $\pm 0.04$    | $\pm 0.04$    | $\pm 0.03$    | $\pm 0.03$    | $\pm 0.01$    | $\pm 0.06$     | $\pm 0.02$     | $\pm 0.02$     |

**Table S3** Surface roughness (Ra) of PEDOT:PSS films

| Sample                                  | P1000-5s           | P2000-5s           | P3000-5s           | P2000-0s           | P2000-5min         | P2000-15min        | P2000-18h          |
|-----------------------------------------|--------------------|--------------------|--------------------|--------------------|--------------------|--------------------|--------------------|
| <b>1<math>\mu\text{m}^2</math>[nm]</b>  | 2.72<br>$\pm 0.07$ | 2.84<br>$\pm 0.09$ | 2.47<br>$\pm 0.14$ | 2.68<br>$\pm 0.20$ | 2.56<br>$\pm 0.14$ | 2.43<br>$\pm 0.12$ | 1.73<br>$\pm 0.10$ |
| <b>10<math>\mu\text{m}^2</math>[nm]</b> | 4.51<br>$\pm 0.52$ | 4.62<br>$\pm 0.54$ | 3.44<br>$\pm 0.34$ | 3.83<br>$\pm 0.24$ | 4.76<br>$\pm 0.43$ | 3.05<br>$\pm 0.39$ | 2.71<br>$\pm 0.16$ |

**Table S4** Surface roughness (Ra) of PANI films

| Sample                                  | PA1500-5s           | PA3000-5s           | PA1500-0s           | PAD1500-5s          | PAD3000-5s          | PAD1500-0s          |
|-----------------------------------------|---------------------|---------------------|---------------------|---------------------|---------------------|---------------------|
| <b>1<math>\mu\text{m}^2</math>[nm]</b>  | 0.652<br>$\pm 0.03$ | 0.764<br>$\pm 0.03$ | 0.841<br>$\pm 0.05$ | 0.761<br>$\pm 0.07$ | 0.708<br>$\pm 0.04$ | 0.784<br>$\pm 0.06$ |
| <b>10<math>\mu\text{m}^2</math>[nm]</b> | 3.78<br>$\pm 1.49$  | 3.94<br>$\pm 1.28$  | 6.07<br>$\pm 1.45$  | 3.17<br>$\pm 0.52$  | 5.31<br>$\pm 1.19$  | 1.78<br>$\pm 0.25$  |

## Supporting Figure

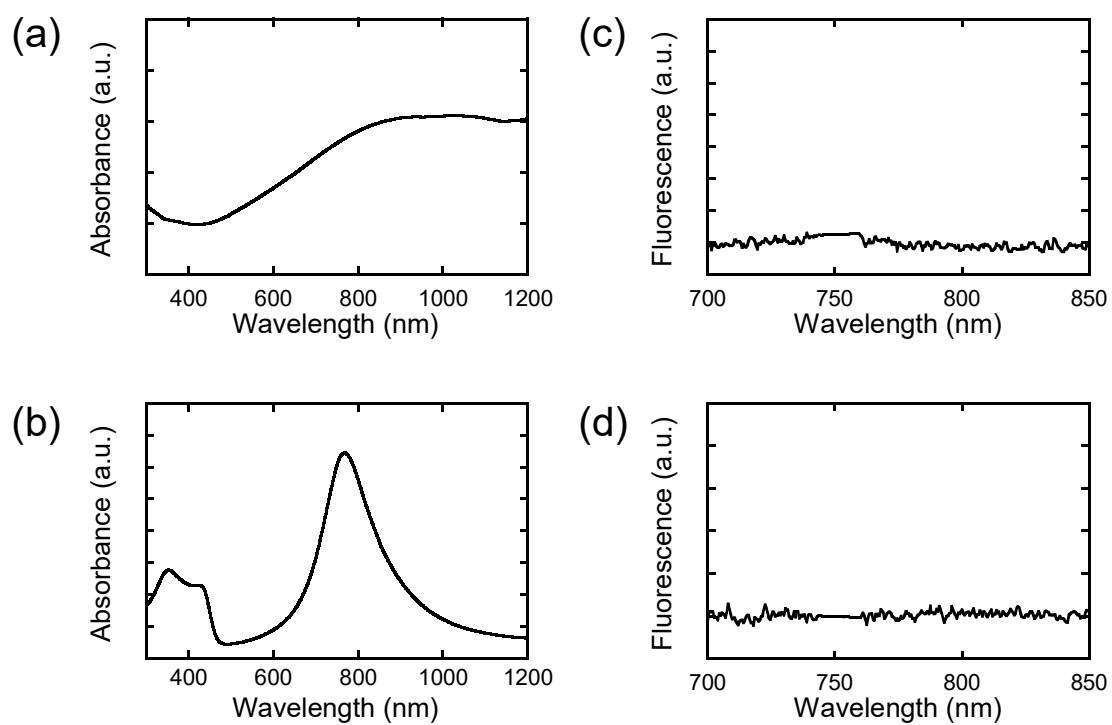

**Figure S1** (a,b) Absorption and (c,d) fluorescence (excited at 750 nm) spectra of the thin films of (a,c) PEDOT:PSS and (b,d) PANI.
